# Supplementary material
Source: publisher figshare collection journal article supplement (https://acs.figshare.com/ndownloader/files/3959935)
Supplement: Supplementary file 1 [file 3959935]

# Coaxial RuO<sub>2</sub>-ITO nanopillars for transparent supercapacitor application

*Ilhwan Ryu,<sup>†</sup> MinHo Yang,<sup>‡</sup> Hyemin Kwon,<sup>†</sup> Hoo Keun Park,<sup>†</sup> Young Rag Do,<sup>†</sup> Sang Bok  
Lee,<sup>\*,‡,\$</sup> and Sanggyu Yim<sup>\*,†</sup>*

<sup>†</sup>Department of Chemistry, Kookmin University, Seoul 136-702, South Korea.

<sup>‡</sup>Graduate School of Nanoscience and Technology, Korea Advanced Institute of Science and  
Technology, Daejeon 305-701, South Korea

<sup>\$</sup>Department of Chemistry and Biochemistry, University of Maryland, College Park, MD 20742,  
USA.

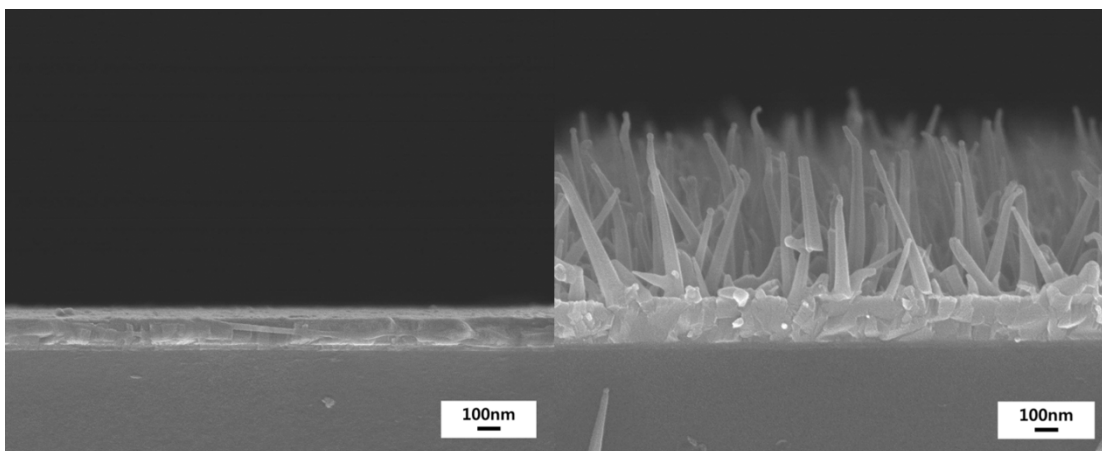

**Figure S1.** Cross-sectional FE-SEM images of the ITO film with a thickness of 140 nm (left) and ITO nanopillars (right) fabricated from ITO film by RF-magnetron sputtering.

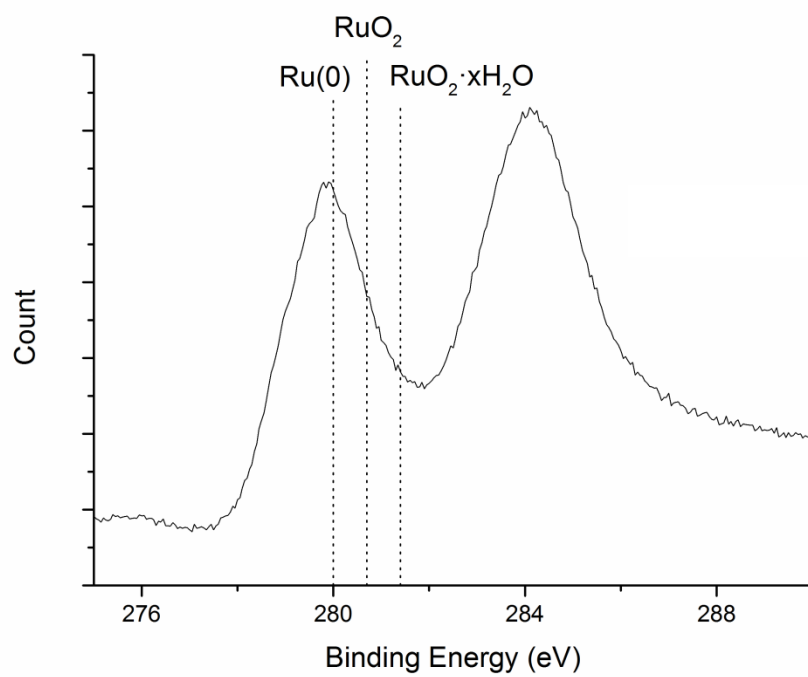

**Figure S2.** XPS spectra of Ru 3d for the hydrous RuO<sub>2</sub> deposits on ITO nanopillars by cathodic deposition at  $-0.8$  V.

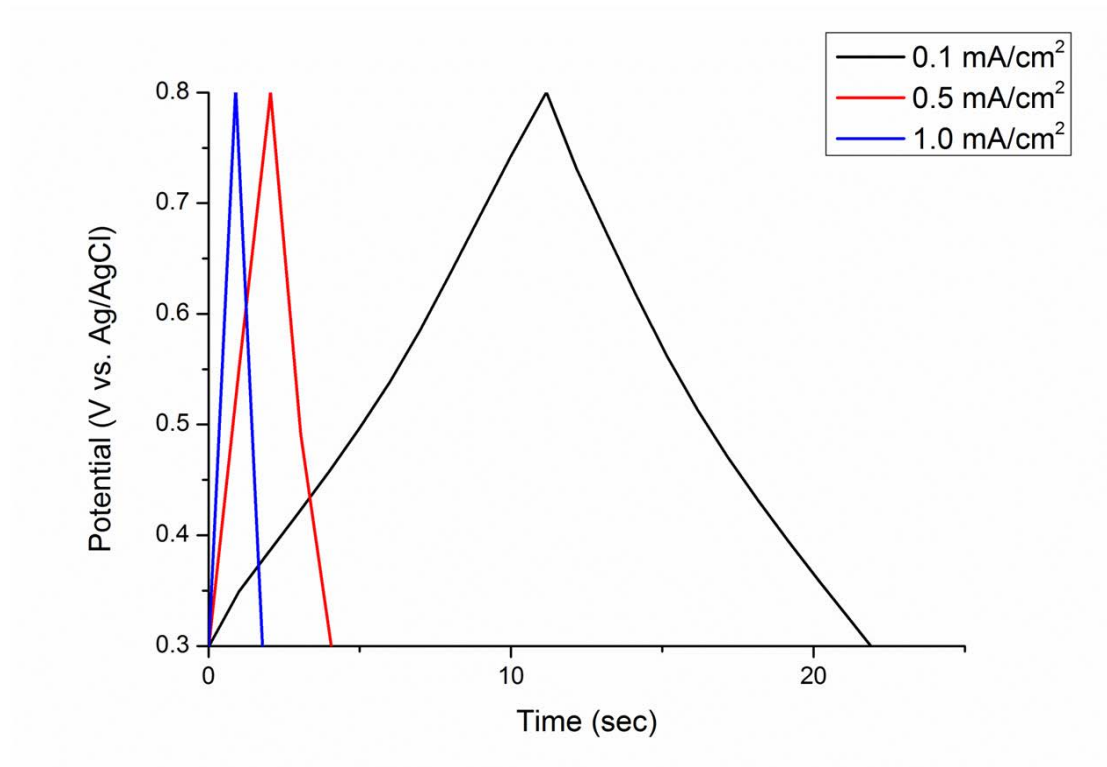

**Figure S3.** Charge-discharge curves at different constant current densities of 0.1, 0.5, and 1.0 mA/cm<sup>2</sup> for 30 cycle RuO<sub>2</sub> electrodeposited ITO coaxial (RuO<sub>2</sub>-ITO) nanopillars.
